# Supplementary material for: DACT2 is a functional tumor suppressor through inhibiting Wnt/β-catenin pathway and associated with poor survival in colon cancer
Source: PubMed Central journal article supplement — Oncogene. 2014 Jul 14;34(20):2575–85. doi: 10.1038/onc.2014.201 (PMC4761644; doi:10.1038/onc.2014.201), 2014-07-14
Supplement: onc2014201x2.pdf [file onc2014201x2.pdf]

## Supplementary figure

```

DACT2 -----MWTGPP-----GSAGWDRRLGARLRAAFAGLQELQGLRATQQERVGALALQPPP
DACT1 MKPSPAGTAKELEPPAPARGEQRTAEPEGRWREKGEADTERQRTREQEATLAGLAELEYLRQEQELLVRGALR-GAGG
DACT3 -----MIRAFSFPVSP-----ERGLRGWLEGLAGLCELHHLRERQEYRVQQALRLAQP
      . . . . . : * * . . : * * * * * * * : . * *

DACT2 APAAPCGPHLHGPEQQ-----LEAALAEQELSRRLQDQIGLKTHLDQLDLQISKLQLDVGTASGEALDSDSRP
DACT1 AGAAAPRAGELLGEEAQRSLREEKFLEENILLRKLQNLRRRDAGLLNQLQELDKQISDLRLDVEKTSEEHLETDSRP
DACT3 MGGAEAEDEE--DADE-----DEDAARAAAELEQLEALPGLVWDLGQQLGDLSESG-----GLEQESGR
      . * . . . . : . . . . * . . * : . : * * * * * * : . * : *

DACT1 SSGFYEMSDGGSCSLSTSCASV--CSDHISP SLGSLLPVAQAH-----KARPSMGDWRPRSVDETTVPAPWRPQATE
DACT2 SSGFYELSDGASGLSNSSNSVFSECLSSCHSSTCFCSPL-----EATLSLSDGCPKSADLIGLLEYKEGHCE
DACT3 SSGFYEDPSSSTGG--PDSPPSTF--CGDSGFSGSSSYGRLGPEPRGIYASERPKSLGDASPSAPEVVG-----
      ***** . . . . . * * . * . . . : . : * : * * : :

DACT2 EGARPPGSVEDAGQPWGTFWPRPVSTGDLDRALPADTGLQKASADAELLGLLQGVVDIPLHVPDPKYRQDLVSGGREV
DACT1 DQAS--GAV-----CRSLSTPQFNSL-----DVIAD-----VNPKYQCDLVSKNGNDV
DACT3 --AR--AAV-----PRSF SAP--YPTA-----GGSAG-----PEACSSAERRARAGP--
      * . . * * . * : . . : . : *

DACT2 YPYP SPLHVALQSPFLVLTKE TPQ-----RGGSFPRESRPGAGLNTIQ TGPVLEAGPARARAYIDRL
DACT1 YRYP SPLHAVAVQSPMFLCLCTGNPLREEDRLGNHASDICGSELDVAKTDS SLPSPSSLSWSASHPSSSKMDGYILSL
DACT3 FLTPSPLHAVAMRSP-----RP-----CGRPTD-----SPDAGGAGRPLDGYISAL
      : ***** : * . . . . . * *

DACT2 LHLWGRE-----TPAKGSEGEQPLRHAASPS-----PQRQGGWSTD
DACT1 VQKKTHPVRTNKPRTSVNADPTKGLLRNGSVCRAPGGVSVQNSVNLKNSKQACLPSGGIPSLNNGTFSPPKQ--WSKE
DACT3 LRRRRR--GAGQPRTS-----PGGADGG-----PRRQ-----
      : . . . . * . . * * . *

DACT2 GGGRLLVFAPGREDEGGPAQSRGAGRGGPQQGYMPLGEPQQSGSLPEEGSKPSNSCVLRETMVQASPSSKAQQT---
DACT1 SKAEQAESKRVLPLEGCP SGAASDLQSKHLPKTAKPASQE HARCSAIGTGESPKESAQLSGASPKESPSRGPAPPQENK
DACT3 -----NSVRQRPDASPS-----PGSARPA REP-----SLERVGHPTSPAALSRAWASSWESEAPEP-----
      . . * : * * * * * * . . . . .

DACT2 -----PSAQDYGRGNI ISPS-----RMLDKSP SPASGHFAHP SFAASKMGPPKSKAEKIKRSPM
DACT1 VVQPLKKMSQKNSLQGVPPATPPLLSTAFFVEERPALDFKSEGSSQSLEEHLVKAQFIPGQQPSVRLHRGHRNMGVVK
DACT3 -----AAPPAAPS-----PPDSPAEGRLVKAQYIPGAQAATR-----GLPG
      : * . . . . . * . . . . . : . :

DACT2 DKVLR FARQPLLLDRPEGAHAA--PQPSLEWDPAHWPTGRGGLO--RRPALAWEAPGRSCSESTLYPMPVLVPLAVAP-
DACT1 NSSLK--HRGPALQGLENGLPTVREKTRAGSKCRFPDDLDTNKKLKKASSKGRKSGG-----GPEAGVGRPAG-
DACT3 RAARR--KPPPLTRGRSVQSPPRERPRAGRRGRMAEASG----RRGSPRARKASRSQSETSLLGRASAVPSGPPKY
      . . . . . . . . . . . : . . . . . * *

DACT2 QESHRTSAQALPFPEASLLTSVARRK--HRRWQSTVEIS---ARARLASCPESNLGP-PRPVARRAGGPLARGRPSLVR
DACT1 --GGHRAGSRAHGHEAVVAKPKHKRTDYRRWKSSAEISYEEALRRARRGRENVGLYPAP-----VPLPYASP----
DACT3 PTAEREEPRPRPRRGPA PTLAAQAAGSCRWRSTAEIDAADGRRVRPAPAARV---PGP-----GPS SAPQRRL
      . * . . . . : . . * * * * * . . : . * * * .

DACT2 QDAYTRSDSEPSKHSACDPRFP SVIPETSEGESDHTNRFGDRESSSSDEEGGAQSRDCDLALGYVAAGHAELAWTQ
DACT1 Y-AYVASDSE---YSAECESLFHSTVVD TSEDEQSNTTNCFGDESSVSEGEFVGESTTTS-----DSEESGLIWSQ
DACT3 Y-GCAGSDSE-----CSA---GRLGPLRGRGPAAGVGGYGESESSASEGESPAFSSASS-----DSDGSGGLVWPQ
      . . * * * * * . . . . . : . . . . * : * * * . . : . * * *

DACT2 EAPVSSGPLLS-----PVPKLCRIKASKALKKKIRRFQPTALKVMTMV
DACT1 --FVQTLPIQTVTAPDLHNHPAKTFVKIKASHNLKKKILRFRSGSLKIMTTV
DACT3 QLVAATAASGGGAGAPAGPAKVFKIKASHALKKKILRFRSGSLKIMTTV
      . : . * . : . * * * * * * . . : * * * *

```
